# Supplementary material for: Molecular profiling of solid tumors by next-generation sequencing: an experience from a clinical laboratory
Source: Front Oncol. 2023 Jul 6;13:1208244. doi: 10.3389/fonc.2023.1208244 (PMC10359709; doi:10.3389/fonc.2023.1208244)
Supplement: Supplementary file 3 [file Table_3.xlsx]

## Sheet: All colorectal-subpanel 
Patient ID	Age	Sex	Variants
C-1	19.8	Male	NRAS:c.38G>A,p.(Gly13Asp)(11.5%)
C-2	26	Male	Negative
C-3	28.3	Female	KRAS:c.35G>T,p.(Gly12Val)(35.1%)
C-4	29.6	Female	NRAS:c.181C>A,p.(Gln61Lys)(22.2%)
C-5	31	Male	NRAS:c.182A>G,p.(Gln61Arg)(25.2%)
C-6	31.6	Female	Negative
C-7	32	Female	Negative
C-8	33.3	Female	KRAS:c.34G>C,p.(Gly12Arg)(44.3%)
C-9	34.3	Male	Negative
C-10	34.3	Female	Negative
C-11	35	Male	KRAS:c.34G>T,p.(Gly12Cys)(25.5%)
C-12	35.2	Male	KRAS:c.35G>A,p.(Gly12Asp)(48.1%)
C-13	35.6	Male	KRAS:c.35G>A,p.(Gly12Asp)(27.2%)
C-14	36.5	Male	Negative
C-15	36.7	Male	Negative
C-16	36.9	Male	KRAS:c.35G>A,p.(Gly12Asp)(58.2%)
C-17	37.4	Female	KRAS:c.34G>A,p.(Gly12Ser)(30.5%)
C-18	37.5	Female	Negative
C-19	37.9	Female	Negative
C-20	39.1	Female	KRAS:c.35G>T,p.(Gly12Val)(71.4%)
C-21	39.2	Female	Negative
C-22	39.5	Female	Negative
C-23	39.9	Female	Negative
C-24	40.1	Female	Negative
C-25	40.1	Male	KRAS:c.35G>C,p.(Gly12Ala)(53.1%)
C-26	40.1	Male	KRAS:c.35G>T,p.(Gly12Val)(27.1%)
C-27	42.3	Male	KRAS:c.35G>A,p.(Gly12Asp)(62.9%)
C-28	42.4	Female	KRAS:c.35G>A,p.(Gly12Asp)(7.5%)
C-29	42.7	Female	BRAF:c.1799T>A,p.(Val600Glu)(16.6%)
C-30	42.7	Male	NRAS:c.182A>T,p.(Gln61Leu)(53%)
C-31	42.9	Male	Negative
C-32	42.9	Female	KRAS:c.38G>A,p.(Gly13Asp)(49%)
C-33	43.9	Female	Negative
C-34	44.3	Male	KRAS:c.34G>A,p.(Gly12Ser)(42.2%)
C-35	44.5	Male	KRAS:c.37G>C,p.(Gly13Arg)(40.1%)
C-36	44.6	Female	BRAF:c.1799T>A,p.(Val600Glu)(35%)
C-37	44.8	Female	Negative
C-38	45	Female	BRAF:c.1799T>A,p.(Val600Glu)(63.7%)
C-39	45.1	Male	KRAS:c.183A>C,p.(Gln61His)(36.5%)
C-40	45.1	Female	KRAS:c.38G>A,p.(Gly13Asp)(55.4%)
C-41	45.2	Female	KRAS:c.35G>A,p.(Gly12Asp)(30.7%)
C-42	45.4	Female	Negative
C-43	45.5	Male	KRAS:c.35G>T,p.(Gly12Val)(8.9%)
C-44	45.5	Female	KRAS:c.38G>A,p.(Gly13Asp)(27.6%)
C-45	45.9	Male	KRAS:c.35G>A,p.(Gly12Asp)(11.2%)
C-46	46.1	Female	Negative
C-47	46.1	Female	KRAS:c.35G>C,p.(Gly12Ala)(30.1%)
C-48	46.4	Male	Negative
C-49	46.7	Female	Negative
C-50	46.8	Female	KRAS:c.34G>T,p.(Gly12Cys)(52.4%)
C-51	46.8	Male	KRAS:c.35G>T,p.(Gly12Val)(22.9%)
C-52	46.8	Male	KRAS:c.436G>A,p.(Ala146Thr)(19.3%)
C-53	47	Male	KRAS:c.35G>T,p.(Gly12Val)(15.6%)
C-54	47.2	Male	KRAS:c.35G>A,p.(Gly12Asp)(49.8%)
C-55	47.3	Male	Negative
C-56	47.5	Male	KRAS:c.182A>T,p.(Gln61Leu)(47%)
C-57	47.6	Female	KRAS:c.35G>A,p.(Gly12Asp)(40.4%)
C-58	47.7	Female	KRAS:c.35G>A,p.(Gly12Asp)(43.8%)
C-59	47.8	Male	Negative
C-60	47.9	Male	Negative
C-61	48	Male	Negative
C-62	48.1	Female	Negative
C-63	48.2	Male	KRAS:c.35G>C,p.(Gly12Ala)(45%)
C-64	48.4	Male	Negative
C-65	48.4	Female	KRAS:c.35G>T,p.(Gly12Val)(45.3%)
C-66	48.6	Male	KRAS:c.35G>C,p.(Gly12Ala)(78.6%)
C-67	49.1	Female	BRAF:c.1799T>A,p.(Val600Glu)(9.3%)
C-68	49.2	Male	Negative
C-69	49.2	Female	KRAS:c.35G>T,p.(Gly12Val)(35%)
C-70	49.4	Female	Negative
C-71	49.7	Male	KRAS:c.35G>A,p.(Gly12Asp)(26.3%)
C-72	49.7	Male	KRAS:c.38_39delinsAG,p.(Gly13Glu)(43%)
C-73	49.8	Male	Negative
C-74	49.9	Female	KRAS:c.35G>A,p.(Gly12Asp)(56%)
C-75	50.1	Female	Negative
C-76	50.2	Female	Negative
C-77	50.2	Male	KRAS:c.436G>A,p.(Ala146Thr)(20.7%)
C-78	50.3	Male	Negative
C-79	50.3	Male	BRAF:c.1799T>A,p.(Val600Glu)(45.5%)
C-80	50.4	Female	KRAS:c.35G>C,p.(Gly12Ala)(17.5%)
C-81	50.5	Female	KRAS:c.176C>G,p.(Ala59Gly)(15.4%)
C-82	50.5	Female	KRAS:c.34G>T,p.(Gly12Cys)(24.7%)
C-83	50.5	Female	Negative
C-84	50.6	Female	KRAS:c.183A>T,p.(Gln61His)(36.1%)
C-85	50.6	Male	Negative
C-86	50.6	Female	KRAS:c.38G>A,p.(Gly13Asp)(57.6%)
C-87	50.8	Male	KRAS:c.35G>A,p.(Gly12Asp)(28.2%)
C-88	50.8	Male	BRAF:c.1799T>A,p.(Val600Glu)(30.3%)
C-89	51	Male	KRAS:c.173C>T,p.(Thr58Ile)(24.1%)
C-90	51	Male	KRAS:c.35G>A,p.(Gly12Asp)(10%)
C-91	51	Female	Negative
C-92	51.1	Female	BRAF:c.1799T>A,p.(Val600Glu)(15.1%)
C-93	51.1	Male	Negative
C-94	51.2	Female	BRAF:c.1799T>A,p.(Val600Glu)(14.5%)
C-95	51.2	Female	Negative
C-96	51.3	Male	NRAS:c.181C>A,p.(Gln61Lys)(28.9%)
C-97	51.4	Male	Negative
C-98	51.6	Female	KRAS:c.35G>A,p.(Gly12Asp)(46.9%)
C-99	52.2	Female	KRAS:c.35G>A,p.(Gly12Asp)(30.5%)
C-100	52.3	Male	Negative
C-101	52.3	Male	KRAS:c.38G>A,p.(Gly13Asp)(7.1%)
C-102	52.3	Female	KRAS:c.436G>A,p.(Ala146Thr)(30.2%)
C-103	52.4	Female	Negative
C-104	52.4	Female	Negative
C-105	52.5	Female	KRAS:c.34G>T,p.(Gly12Cys)(17.5%)
C-106	52.6	Female	KRAS:c.38G>A,p.(Gly13Asp)(31.6%)
C-107	52.8	Female	Negative
C-108	52.9	Male	Negative
C-109	53	Male	NRAS:c.182A>G,p.(Gln61Arg)(33.6%)
C-110	53	Female	Negative
C-111	53.2	Female	KRAS:c.35G>C,p.(Gly12Ala)(30.4%)
C-112	53.3	Female	KRAS:c.35G>A,p.(Gly12Asp)(43.5%)
C-113	53.5	Female	Negative
C-114	53.6	Female	KRAS:c.34G>C,p.(Gly12Arg)(38.3%)
C-115	53.6	Male	Negative
C-116	53.6	Female	KRAS:c.37G>C,p.(Gly13Arg)(34.7%)
C-117	53.7	Male	BRAF:c.1799T>A,p.(Val600Glu)(29.3%)
C-118	53.7	Female	NRAS:c.182A>G,p.(Gln61Arg)(49.6%)
C-119	53.8	Male	Negative
C-120	54	Female	KRAS:c.35G>A,p.(Gly12Asp)(25.6%)
C-121	54	Female	KRAS:c.35G>A,p.(Gly12Asp)(31.8%)
C-122	54	Male	Negative
C-123	54.1	Male	Negative
C-124	54.1	Female	Negative
C-125	54.3	Female	BRAF:c.1799T>A,p.(Val600Glu)(37.2%)
C-126	54.4	Male	KRAS:c.35G>A,p.(Gly12Asp)(40%)
C-127	54.4	Male	KRAS:c.35G>C,p.(Gly12Ala)(19.1%)
C-128	54.4	Female	Negative
C-129	54.5	Male	Negative
C-130	54.5	Male	Negative
C-131	54.6	Male	KRAS:c.183A>T,p.(Gln61His)(18.2%)
C-132	54.6	Male	Negative
C-133	54.6	Female	Negative
C-134	54.6	Male	KRAS:c.35G>C,p.(Gly12Ala)(17.5%)
C-135	54.6	Female	KRAS:c.38G>A,p.(Gly13Asp)(20.9%)
C-136	54.6	Female	NRAS:c.37G>C,p.(Gly13Arg)(41%)
C-137	54.9	Male	KRAS:c.182A>T,p.(Gln61Leu)(41.2%)
C-138	55	Male	Negative
C-139	55.1	Female	KRAS:c.35G>A,p.(Gly12Asp)(17.1%)
C-140	55.1	Male	KRAS:c.38G>A,p.(Gly13Asp)(18.1%)
C-141	55.2	Female	Negative
C-142	55.3	Male	Negative
C-143	55.3	Male	KRAS:c.35G>A,p.(Gly12Asp)(43.2%)
C-144	55.3	Male	KRAS:c.35G>C,p.(Gly12Ala)(15.2%)
C-145	55.3	Female	Negative
C-146	55.3	Female	Negative
C-147	55.4	Male	Negative
C-148	55.4	Female	KRAS:c.38G>A,p.(Gly13Asp)(29.8%)
C-149	55.5	Male	Negative
C-150	55.5	Female	Negative
C-151	55.6	Male	Negative
C-152	55.7	Male	BRAF:c.1799T>A,p.(Val600Glu)(51%)
C-153	55.7	Male	Negative
C-154	55.8	Male	Negative
C-155	55.8	Male	Negative
C-156	55.8	Female	Negative
C-157	55.9	Female	Negative
C-158	55.9	Male	Negative
C-159	55.9	Male	Negative
C-160	55.9	Male	KRAS:c.436G>A,p.(Ala146Thr)(60.2%)
C-161	56	Male	Negative
C-162	56.1	Female	Negative
C-163	56.1	Male	KRAS:c.35G>T,p.(Gly12Val)(44.6%)
C-164	56.2	Female	Negative
C-165	56.3	Male	KRAS:c.35G>T,p.(Gly12Val)(45.3%)
C-166	56.4	Female	Negative
C-167	56.5	Male	Negative
C-168	56.5	Female	KRAS:c.436G>A,p.(Ala146Thr)(26.4%)
C-169	56.5	Male	Negative
C-170	56.7	Female	KRAS:c.351A>T,p.(Lys117Asn)(45%)
C-171	56.7	Female	Negative
C-172	56.7	Male	KRAS:c.35G>C,p.(Gly12Ala)(34%)
C-173	59.1	Male	BRAF:c.1799T>A,p.(Val600Glu)(43%)
C-174	56.9	Male	Negative
C-175	57	Male	Negative
C-176	57.2	Female	KRAS:c.35G>A,p.(Gly12Asp)(19.5%)
C-177	57.2	Male	KRAS:c.35G>A,p.(Gly12Asp)(76.1%)
C-178	57.2	Male	KRAS:c.35G>A,p.(Gly12Asp)(9.9%)
C-179	57.3	Female	KRAS:c.34G>T,p.(Gly12Cys)(45.1%)
C-180	57.3	Female	Negative
C-181	57.3	Male	KRAS:c.35G>T,p.(Gly12Val)(52.6%)
C-182	57.5	Male	Negative
C-183	57.6	Female	KRAS:c.35G>A,p.(Gly12Asp)(33.8%)
C-184	57.8	Female	KRAS:c.34G>T,p.(Gly12Cys)(10.9%)
C-185	57.9	Male	KRAS:c.35G>C,p.(Gly12Ala)(32.7%)
C-186	57.9	Male	KRAS:c.436G>A,p.(Ala146Thr)(36%)
C-187	58	Male	Negative
C-188	58	Male	KRAS:c.38G>A,p.(Gly13Asp)(14.2%)
C-189	58	Male	KRAS:c.38G>A,p.(Gly13Asp)(24.4%)
C-190	59.8	Male	BRAF:c.1799T>A,p.(Val600Glu)(53.7%)
C-191	58.1	Female	Negative
C-192	58.2	Male	Negative
C-193	58.4	Female	KRAS:c.34G>A,p.(Gly12Ser)(35.8%)
C-194	58.5	Female	KRAS:c.35G>A,p.(Gly12Asp)(49.6%)
C-195	58.6	Male	Negative
C-196	58.7	Female	KRAS:c.35G>A,p.(Gly12Asp)(30.4%); KRAS:c.436G>A,p.(Ala146Thr)(5.2%)
C-197	58.8	Female	KRAS:c.35G>T,p.(Gly12Val)(28.6%)
C-198	58.9	Female	KRAS:c.35G>T,p.(Gly12Val)(95.6%)
C-199	59	Male	KRAS:c.35G>C,p.(Gly12Ala)(32.8%)
C-200	61.9	Male	BRAF:c.1799T>A,p.(Val600Glu)(25.1%)
C-201	59.3	Male	KRAS:c.175G>A,p.(Ala59Thr)(28.6%)
C-202	59.4	Male	KRAS:c.35G>A,p.(Gly12Asp)(21.7%)
C-203	59.4	Female	KRAS:c.35G>T,p.(Gly12Val)(28.4%)
C-204	59.4	Male	NRAS:c.34G>T,p.(Gly12Cys)(55.3%)
C-205	59.4	Female	KRAS:c.436G>A,p.(Ala146Thr)(34.8%)
C-206	62	Female	BRAF:c.1799T>A,p.(Val600Glu)(43%)
C-207	59.5	Female	KRAS:c.35G>C,p.(Gly12Ala)(28.6%)
C-208	59.5	Female	Negative
C-209	59.5	Male	KRAS:c.436G>A,p.(Ala146Thr)(65.9%)
C-210	59.6	Male	KRAS:c.351A>C,p.(Lys117Asn)(48.4%)
C-211	59.6	Male	KRAS:c.38G>A,p.(Gly13Asp)(28.8%)
C-212	59.8	Female	Negative
C-213	59.8	Male	KRAS:c.35G>A,p.(Gly12Asp)(54.3%)
C-214	59.8	Female	KRAS:c.35G>T,p.(Gly12Val)(34.8%)
C-215	63.3	Female	BRAF:c.1799T>A,p.(Val600Glu)(21.9%)
C-216	59.8	Female	KRAS:c.436G>A,p.(Ala146Thr)(7.8%)
C-217	59.9	Female	KRAS:c.34G>A,p.(Gly12Ser)(8.1%)
C-218	59.9	Female	Negative
C-219	59.9	Male	Negative
C-220	59.9	Female	KRAS:c.35G>T,p.(Gly12Val)(46%)
C-221	59.9	Male	KRAS:c.436G>A,p.(Ala146Thr)(22.6%)
C-222	60.1	Male	KRAS:c.182A>G,p.(Gln61Arg)(25.6%)
C-223	60.2	Male	KRAS:c.35G>A,p.(Gly12Asp)(26.1%)
C-224	60.2	Female	Negative
C-225	60.3	Male	KRAS:c.35G>C,p.(Gly12Ala)(40.9%)
C-226	60.5	Female	Negative
C-227	60.5	Female	KRAS:c.35G>T,p.(Gly12Val)(55.9%)
C-228	60.6	Male	Negative
C-229	60.6	Male	KRAS:c.35G>C,p.(Gly12Ala)(32.9%)
C-230	60.6	Male	Negative
C-231	60.6	Female	KRAS:c.436G>A,p.(Ala146Thr)(27%)
C-232	60.7	Male	Negative
C-233	60.7	Male	Negative
C-234	60.8	Male	Negative
C-235	60.8	Male	KRAS:c.34G>C,p.(Gly12Arg)(17.8%)
C-236	60.8	Male	KRAS:c.35G>C,p.(Gly12Ala)(29.4%)
C-237	60.8	Male	KRAS:c.38G>A,p.(Gly13Asp)(23.9%)
C-238	61.1	Female	KRAS:c.183A>C,p.(Gln61His)(82.4%)
C-239	61.1	Male	KRAS:c.35G>A,p.(Gly12Asp)(19.2%)
C-240	61.1	Male	KRAS:c.35G>T,p.(Gly12Val)(29.7%)
C-241	65	Female	BRAF:c.1799T>A,p.(Val600Glu)(38.3%)
C-242	61.3	Male	Negative
C-243	61.5	Male	KRAS:c.180_181delTCinsAA,p.(Gln61Lys)(46.8%)
C-244	61.5	Male	KRAS:c.35G>A,p.(Gly12Asp)(28.5%)
C-245	61.5	Male	Negative
C-246	61.5	Male	Negative
C-247	61.6	Male	Negative
C-248	61.6	Male	KRAS:c.35G>A,p.(Gly12Asp)(62.9%)
C-249	61.8	Male	Negative
C-250	65.3	Female	BRAF:c.1799T>A,p.(Val600Glu)(13%)
C-251	61.9	Male	Negative
C-252	61.9	Female	Negative
C-253	65.3	Male	BRAF:c.1799T>A,p.(Val600Glu)(8.8%)
C-254	62.1	Male	KRAS:c.35G>A,p.(Gly12Asp)(28.7%)
C-255	62.1	Female	KRAS:c.38G>A,p.(Gly13Asp)(23.8%)
C-256	62.2	Male	KRAS:c.183A>C,p.(Gln61His)(23.2%)
C-257	62.2	Male	Negative
C-258	62.2	Male	KRAS:c.35G>C,p.(Gly12Ala)(26.3%)
C-259	62.3	Male	KRAS:c.38G>A,p.(Gly13Asp)(39.6%)
C-260	62.4	Female	Negative
C-261	62.6	Male	NRAS:c.182A>G,p.(Gln61Arg)(24.8%)
C-262	62.8	Male	KRAS:c.35G>T,p.(Gly12Val)(25.5%)
C-263	63	Female	Negative
C-264	63	Male	KRAS:c.35G>C,p.(Gly12Ala)(7.3%)
C-265	63.1	Male	KRAS:c.35G>A,p.(Gly12Asp)(13.3%)
C-266	63.1	Male	Negative
C-267	63.2	Male	KRAS:c.35G>T,p.(Gly12Val)(39.1%)
C-268	63.3	Male	KRAS:c.182A>G,p.(Gln61Arg)(32.9%)
C-269	63.3	Male	Negative
C-270	65.5	Male	BRAF:c.1799T>A,p.(Val600Glu)(37.8%)
C-271	63.3	Male	Negative
C-272	63.4	Male	Negative
C-273	63.4	Male	Negative
C-274	63.4	Female	KRAS:c.35G>T,p.(Gly12Val)(32.4%)
C-275	63.4	Male	Negative
C-276	65.9	Male	BRAF:c.1799T>A,p.(Val600Glu)(31.3%)
C-277	63.6	Female	KRAS:c.35G>A,p.(Gly12Asp)(34.4%)
C-278	63.7	Male	Negative
C-279	63.8	Male	KRAS:c.34G>A,p.(Gly12Ser)(17%)
C-280	63.8	Male	Negative
C-281	63.8	Male	KRAS:c.35G>C,p.(Gly12Ala)(40.4%)
C-282	63.9	Male	KRAS:c.35G>T,p.(Gly12Val)(46.8%)
C-283	64	Female	KRAS:c.35G>A,p.(Gly12Asp)(52.8%)
C-284	64.2	Male	Negative
C-285	64.4	Male	Negative
C-286	64.4	Male	NRAS:c.183A>T,p.(Gln61His)(28.8%)
C-287	64.4	Female	Negative
C-288	64.5	Female	Negative
C-289	64.6	Male	Negative
C-290	64.6	Male	Negative
C-291	64.7	Male	KRAS:c.34G>A,p.(Gly12Ser)(36.8%)
C-292	64.7	Female	KRAS:c.35G>A,p.(Gly12Asp)(31.1%)
C-293	64.7	Male	KRAS:c.35G>A,p.(Gly12Asp)(33.2%)
C-294	64.7	Male	KRAS:c.437C>T,p.(Ala146Val)(6.4%)
C-295	64.8	Female	KRAS:c.35G>A,p.(Gly12Asp)(47.2%)
C-296	64.8	Male	Negative
C-297	64.9	Female	NRAS:c.181C>A,p.(Gln61Lys)(40.6%)
C-298	64.9	Female	KRAS:c.35G>T,p.(Gly12Val)(31.7%)
C-299	65	Female	Negative
C-300	65	Female	NRAS:c.182A>G,p.(Gln61Arg)(51.8%)
C-301	66.1	Male	BRAF:c.1799T>A,p.(Val600Glu)(39.7%)
C-302	65	Male	Negative
C-303	65.1	Female	KRAS:c.35G>C,p.(Gly12Ala)(30.3%); NRAS:c.35G>T,p.(Gly12Val)(7.8%)
C-304	65.1	Male	KRAS:c.34G>T,p.(Gly12Cys)(42.1%)
C-305	65.1	Female	KRAS:c.35G>T,p.(Gly12Val)(63.1%)
C-306	65.1	Male	KRAS:c.38G>A,p.(Gly13Asp)(37.4%)
C-307	65.1	Male	Negative
C-308	65.2	Male	KRAS:c.38G>A,p.(Gly13Asp)(42.3%)
C-309	65.2	Female	KRAS:c.436G>A,p.(Ala146Thr)(30.4%)
C-310	65.3	Female	Negative
C-311	66.2	Female	BRAF:c.1799T>A,p.(Val600Glu)(41%)
C-312	66.8	Female	BRAF:c.1799T>A,p.(Val600Glu)(45%)
C-313	65.4	Female	KRAS:c.35G>A,p.(Gly12Asp)(28.7%)
C-314	65.4	Female	Negative
C-315	67.1	Female	BRAF:c.1799T>A,p.(Val600Glu)(23.1%)
C-316	67.1	Female	BRAF:c.1799T>A,p.(Val600Glu)(34%)
C-317	65.6	Male	KRAS:c.35G>T,p.(Gly12Val)(6.3%)
C-318	65.6	Female	Negative
C-319	65.8	Male	Negative
C-320	67.7	Female	BRAF:c.1799T>A,p.(Val600Glu)(30.2%)
C-321	65.9	Female	KRAS:c.35G>A,p.(Gly12Asp)(6%)
C-322	65.9	Male	KRAS:c.38G>A,p.(Gly13Asp)(13%)
C-323	65.9	Male	Negative
C-324	66	Female	KRAS:c.34G>T,p.(Gly12Cys)(46.8%)
C-325	66	Male	KRAS:c.35G>A,p.(Gly12Asp)(62.7%)
C-326	66.1	Male	Negative
C-327	66.1	Male	KRAS:c.35G>A,p.(Gly12Asp)(26.9%)
C-328	67.9	Female	BRAF:c.1799T>A,p.(Val600Glu)(15.7%)
C-329	68.1	Female	BRAF:c.1799T>A,p.(Val600Glu)(2.3%)
C-330	66.3	Male	KRAS:c.35G>T,p.(Gly12Val)(39.9%)
C-331	66.4	Male	KRAS:c.34G>T,p.(Gly12Cys)(61.7%)
C-332	66.4	Male	KRAS:c.35G>A,p.(Gly12Asp)(66%)
C-333	66.5	Male	Negative
C-334	66.5	Female	Negative
C-335	66.5	Male	KRAS:c.35G>A,p.(Gly12Asp)(42.5%)
C-336	66.6	Male	Negative
C-337	66.7	Male	NRAS:c.181C>A,p.(Gln61Lys)(25.5%)
C-338	66.7	Female	KRAS:c.34G>A,p.(Gly12Ser)(41.1%)
C-339	66.7	Male	Negative
C-340	66.7	Male	KRAS:c.35G>A,p.(Gly12Asp)(49.6%)
C-341	66.7	Male	Negative
C-342	66.7	Male	Negative
C-343	66.7	Male	Negative
C-344	66.7	Male	KRAS:c.35G>T,p.(Gly12Val)(40.7%)
C-345	66.7	Female	KRAS:c.38G>A,p.(Gly13Asp)(49.3%)
C-346	66.8	Female	Negative
C-347	66.8	Female	Negative
C-348	68.1	Female	BRAF:c.1799T>A,p.(Val600Glu)(44.4%)
C-349	66.9	Female	Negative
C-350	67	Female	Negative
C-351	67	Female	KRAS:c.35G>A,p.(Gly12Asp)(42.9%)
C-352	67	Male	Negative
C-353	67	Female	Negative
C-354	67	Male	Negative
C-355	68.1	Female	BRAF:c.1799T>A,p.(Val600Glu)(9.5%)
C-356	68.8	Male	BRAF:c.1799T>A,p.(Val600Glu)(39.6%)
C-357	67.2	Male	KRAS:c.34G>T,p.(Gly12Cys)(37.6%)
C-358	67.2	Female	Negative
C-359	67.2	Male	Negative
C-360	67.3	Male	Negative
C-361	67.4	Male	Negative
C-362	67.4	Male	KRAS:c.436G>C,p.(Ala146Pro)(45.4%)
C-363	67.5	Male	KRAS:c.182A>G,p.(Gln61Arg)(50.6%)
C-364	67.5	Male	Negative
C-365	67.6	Female	Negative
C-366	67.6	Female	KRAS:c.35G>A,p.(Gly12Asp)(31.4%)
C-367	68.9	Female	BRAF:c.1799T>A,p.(Val600Glu)(26.8%)
C-368	67.7	Male	Negative
C-369	67.7	Female	Negative
C-370	67.8	Male	KRAS:c.35G>T,p.(Gly12Val)(33.1%)
C-371	67.8	Male	Negative
C-372	69.6	Male	BRAF:c.1799T>A,p.(Val600Glu)(50.5%)
C-373	67.9	Female	Negative
C-374	67.9	Female	KRAS:c.38G>A,p.(Gly13Asp)(54.6%)
C-375	68	Male	KRAS:c.34_35delGGinsTT,p.(Gly12Phe)(44.7%)
C-376	68	Female	KRAS:c.34G>T,p.(Gly12Cys)(36%)
C-377	68	Male	Negative
C-378	68	Male	Negative
C-379	69.9	Female	BRAF:c.1799T>A,p.(Val600Glu)(49%)
C-380	68.1	Female	KRAS:c.35G>C,p.(Gly12Ala)(67.7%)
C-381	71	Male	BRAF:c.1799T>A,p.(Val600Glu)(33.7%)
C-382	71.4	Female	NRAS:c.436G>A,p.(Ala146Thr)(5.5%); BRAF:c.1799T>A,p.(Val600Glu)(52.8%)
C-383	68.2	Male	Negative
C-384	68.2	Female	KRAS:c.37G>C,p.(Gly13Arg)(49.8%)
C-385	68.3	Female	KRAS:c.35G>A,p.(Gly12Asp)(16.8%)
C-386	68.4	Female	Negative
C-387	68.4	Female	KRAS:c.38G>A,p.(Gly13Asp)(26%)
C-388	68.7	Female	Negative
C-389	68.8	Male	KRAS:c.35G>C,p.(Gly12Ala)(47.6%)
C-390	71.6	Male	BRAF:c.1799T>A,p.(Val600Glu)(38.6%)
C-391	68.8	Male	KRAS:c.35G>T,p.(Gly12Val)(17.1%)
C-392	71.8	Female	BRAF:c.1799T>A,p.(Val600Glu)(38.2%)
C-393	68.9	Female	KRAS:c.35G>A,p.(Gly12Asp)(43.5%)
C-394	68.9	Male	Negative
C-395	69	Male	KRAS:c.35G>T,p.(Gly12Val)(47.2%)
C-396	69.1	Female	Negative
C-397	69.1	Female	KRAS:c.35G>C,p.(Gly12Ala)(48.3%)
C-398	69.2	Male	KRAS:c.34G>C,p.(Gly12Arg)(57.6%)
C-399	69.2	Male	KRAS:c.35G>A,p.(Gly12Asp)(26.2%)
C-400	69.2	Male	Negative
C-401	69.4	Male	Negative
C-402	69.4	Male	KRAS:c.35G>T,p.(Gly12Val)(36.3%)
C-403	69.4	Male	KRAS:c.35G>T,p.(Gly12Val)(38.8%)
C-404	69.6	Male	KRAS:c.34G>A,p.(Gly12Ser)(42.7%)
C-405	72.1	Male	BRAF:c.1799T>A,p.(Val600Glu)(20.3%)
C-406	69.6	Female	Negative
C-407	69.8	Male	Negative
C-408	69.9	Male	KRAS:c.35G>A,p.(Gly12Asp)(15.9%)
C-409	69.9	Male	Negative
C-410	72.4	Male	BRAF:c.1799T>A,p.(Val600Glu)(42.7%)
C-411	69.9	Male	Negative
C-412	70	Male	Negative
C-413	70	Male	KRAS:c.35G>T,p.(Gly12Val)(80.5%)
C-414	70	Female	Negative
C-415	70.1	Female	NRAS:c.182A>G,p.(Gln61Arg)(34.3%)
C-416	70.1	Female	KRAS:c.35G>A,p.(Gly12Asp)(42.9%)
C-417	70.1	Female	Negative
C-418	70.1	Female	Negative
C-419	72.4	Female	BRAF:c.1799T>A,p.(Val600Glu)(47.9%)
C-420	70.2	Male	Negative
C-421	70.3	Male	KRAS:c.182A>T,p.(Gln61Leu)(30.6%)
C-422	70.3	Male	KRAS:c.34G>A,p.(Gly12Ser)(77.4%)
C-423	70.3	Female	NRAS:c.37G>C,p.(Gly13Arg)(45.5%)
C-424	70.4	Male	KRAS:c.436G>A,p.(Ala146Thr)(13.8%)
C-425	70.4	Male	NRAS:c.35G>A,p.(Gly12Asp)(69.3%)
C-426	70.4	Female	Negative
C-427	70.5	Male	Negative
C-428	70.5	Female	Negative
C-429	70.6	Male	KRAS:c.35G>A,p.(Gly12Asp)(35.6%)
C-430	70.7	Male	Negative
C-431	70.7	Male	KRAS:c.35G>A,p.(Gly12Asp)(38.6%)
C-432	70.7	Female	KRAS:c.35G>A,p.(Gly12Asp)(43.9%)
C-433	70.8	Male	Negative
C-434	70.8	Male	Negative
C-435	70.8	Male	KRAS:c.38G>A,p.(Gly13Asp)(44.9%)
C-436	73	Female	BRAF:c.1799T>A,p.(Val600Glu)(18.8%)
C-437	70.9	Male	KRAS:c.35G>T,p.(Gly12Val)(35.3%)
C-438	71	Male	KRAS:c.34G>A,p.(Gly12Ser)(63.9%)
C-439	73.5	Female	BRAF:c.1799T>A,p.(Val600Glu)(35.3%)
C-440	71	Male	Negative
C-441	71	Male	Negative
C-442	71.1	Female	KRAS:c.34G>T,p.(Gly12Cys)(32.8%)
C-443	71.1	Male	Negative
C-444	71.1	Male	Negative
C-445	71.2	Male	KRAS:c.35G>A,p.(Gly12Asp)(17.6%)
C-446	71.2	Female	KRAS:c.35G>A,p.(Gly12Asp)(37.4%)
C-447	71.2	Male	KRAS:c.436G>A,p.(Ala146Thr)(13.4%)
C-448	71.3	Male	Negative
C-449	71.3	Male	Negative
C-450	71.3	Male	Negative
C-451	71.4	Male	Negative
C-452	71.4	Male	Negative
C-453	71.4	Female	KRAS:c.35G>A,p.(Gly12Asp)(30.8%)
C-454	71.4	Male	KRAS:c.35G>A,p.(Gly12Asp)(35%)
C-455	71.4	Female	Negative
C-456	71.4	Male	Negative
C-457	73.6	Female	BRAF:c.1799T>A,p.(Val600Glu)(32.6%)
C-458	71.5	Male	KRAS:c.38G>A,p.(Gly13Asp)(32.3%)
C-459	73.6	Male	BRAF:c.1799T>A,p.(Val600Glu)(70.6%)
C-460	71.7	Male	Negative
C-461	71.7	Male	Negative
C-462	74	Male	BRAF:c.1799T>A,p.(Val600Glu)(28.1%)
C-463	71.9	Male	KRAS:c.35G>A,p.(Gly12Asp)(62.5%)
C-464	71.9	Male	Negative
C-465	72	Female	KRAS:c.34G>T,p.(Gly12Cys)(51.1%)
C-466	74.3	Male	BRAF:c.1799T>A,p.(Val600Glu)(13%)
C-467	72.1	Female	KRAS:c.35G>A,p.(Gly12Asp)(38.2%)
C-468	72.1	Male	KRAS:c.35G>C,p.(Gly12Ala)(37.8%)
C-469	72.2	Male	Negative
C-470	72.2	Male	Negative
C-471	72.3	Male	KRAS:c.183A>C,p.(Gln61His)(35.6%)
C-472	72.3	Male	KRAS:c.34G>T,p.(Gly12Cys)(35.1%)
C-473	72.3	Male	KRAS:c.35G>A,p.(Gly12Asp)(11.3%)
C-474	72.4	Male	Negative
C-475	72.4	Male	Negative
C-476	72.4	Male	Negative
C-477	72.4	Male	Negative
C-478	72.4	Male	KRAS:c.35G>A,p.(Gly12Asp)(45.5%)
C-479	72.4	Male	KRAS:c.35G>A,p.(Gly12Asp)(47.9%)
C-480	72.4	Male	KRAS:c.35G>A,p.(Gly12Asp)(61.9%)
C-481	74.3	Female	BRAF:c.1799T>A,p.(Val600Glu)(47.1%)
C-482	72.4	Female	KRAS:c.35G>T,p.(Gly12Val)(35.8%)
C-483	74.5	Female	BRAF:c.1799T>A,p.(Val600Glu)(35.1%)
C-484	72.5	Male	KRAS:c.34G>T,p.(Gly12Cys)(50.1%)
C-485	72.5	Male	KRAS:c.35G>A,p.(Gly12Asp)(25.2%)
C-486	72.5	Female	Negative
C-487	72.6	Female	KRAS:c.180_181delTCinsAA,p.(Gln61Lys)(73.9%)
C-488	72.6	Female	KRAS:c.34G>A,p.(Gly12Ser)(25.7%)
C-489	72.7	Male	KRAS:c.35G>A,p.(Gly12Asp)(25.2%)
C-490	72.7	Male	KRAS:c.436G>A,p.(Ala146Thr)(59.2%)
C-491	72.8	Male	Negative
C-492	72.8	Female	Negative
C-493	72.8	Female	KRAS:c.35G>A,p.(Gly12Asp)(34.7%)
C-494	72.8	Male	Negative
C-495	72.8	Male	Negative
C-496	72.9	Male	KRAS:c.35G>T,p.(Gly12Val)(18.6%)
C-497	72.9	Female	KRAS:c.35G>T,p.(Gly12Val)(47.8%)
C-498	73	Female	Negative
C-499	73	Female	KRAS:c.34_35delGGinsTT,p.(Gly12Phe)(62.3%)
C-500	74.8	Female	BRAF:c.1799T>A,p.(Val600Glu)(24.6%)
C-501	73	Male	Negative
C-502	73.1	Male	Negative
C-503	73.2	Male	Negative
C-504	73.2	Male	Negative
C-505	73.2	Male	KRAS:c.436G>A,p.(Ala146Thr)(71.4%)
C-506	73.3	Male	Negative
C-507	73.3	Male	KRAS:c.34G>T,p.(Gly12Cys)(45.1%)
C-508	73.4	Male	Negative
C-509	73.5	Female	Negative
C-510	73.5	Male	Negative
C-511	73.5	Female	KRAS:c.35G>A,p.(Gly12Asp)(45.1%)
C-512	75.9	Female	BRAF:c.1799T>A,p.(Val600Glu)(20.7%)
C-513	76.4	Male	BRAF:c.1799T>A,p.(Val600Glu)(37.3%)
C-514	76.8	Female	BRAF:c.1799T>A,p.(Val600Glu)(43.2%)
C-515	73.7	Male	KRAS:c.35G>A,p.(Gly12Asp)(39.3%)
C-516	73.8	Female	KRAS:c.35G>A,p.(Gly12Asp)(63%)
C-517	73.8	Female	Negative
C-518	73.8	Male	KRAS:c.38G>A,p.(Gly13Asp)(29.3%)
C-519	73.8	Male	KRAS:c.436G>A,p.(Ala146Thr)(72.7%)
C-520	73.9	Male	Negative
C-521	73.9	Male	Negative
C-522	73.9	Female	KRAS:c.436G>A,p.(Ala146Thr)(56.9%)
C-523	77	Female	BRAF:c.1799T>A,p.(Val600Glu)(8.8%)
C-524	74.1	Male	KRAS:c.35G>C,p.(Gly12Ala)(72.9%)
C-525	74.2	Female	Negative
C-526	74.2	Male	KRAS:c.436G>C,p.(Ala146Pro)(24.6%)
C-527	77.1	Female	BRAF:c.1799T>A,p.(Val600Glu)(25.5%)
C-528	74.3	Female	KRAS:c.35G>A,p.(Gly12Asp)(33.7%)
C-529	77.9	Female	BRAF:c.1799T>A,p.(Val600Glu)(35.6%)
C-530	74.4	Male	Negative
C-531	74.5	Male	Negative
C-532	74.5	Male	Negative
C-533	77.9	Male	BRAF:c.1799T>A,p.(Val600Glu)(39.5%)
C-534	78.6	Female	BRAF:c.1799T>A,p.(Val600Glu)(43.5%)
C-535	74.8	Male	KRAS:c.35G>A,p.(Gly12Asp)(38%)
C-536	74.9	Female	Negative
C-537	74.9	Male	Negative
C-538	74.9	Female	KRAS:c.35G>A,p.(Gly12Asp)(19.7%)
C-539	74.9	Male	KRAS:c.35G>T,p.(Gly12Val)(44.4%)
C-540	74.9	Male	Negative
C-541	75	Female	Negative
C-542	75.1	Male	KRAS:c.35G>A,p.(Gly12Asp)(44%)
C-543	75.1	Male	Negative
C-544	75.1	Male	Negative
C-545	75.1	Female	KRAS:c.436G>A,p.(Ala146Thr)(64.8%)
C-546	75.2	Male	KRAS:c.35G>A,p.(Gly12Asp)(55.5%)
C-547	75.3	Male	KRAS:c.34G>T,p.(Gly12Cys)(74.9%)
C-548	75.4	Female	KRAS:c.35G>T,p.(Gly12Val)(17.4%)
C-549	75.5	Female	KRAS:c.38G>A,p.(Gly13Asp)(53.2%)
C-550	75.6	Male	KRAS:c.35G>A,p.(Gly12Asp)(21.8%)
C-551	75.6	Female	Negative
C-552	75.7	Male	KRAS:c.35G>T,p.(Gly12Val)(42.6%)
C-553	78.7	Female	BRAF:c.1799T>A,p.(Val600Glu)(49.8%)
C-554	75.9	Male	KRAS:c.35G>A,p.(Gly12Asp)(34.3%)
C-555	75.9	Male	NRAS:c.35G>A,p.(Gly12Asp)(72.4%)
C-556	76	Female	NRAS:c.37G>C,p.(Gly13Arg)(35.4%)
C-557	76.2	Male	Negative
C-558	76.2	Male	KRAS:c.35G>A,p.(Gly12Asp)(57.8%)
C-559	76.2	Male	KRAS:c.436G>A,p.(Ala146Thr)(42.2%)
C-560	76.3	Female	KRAS:c.34G>A,p.(Gly12Ser)(49.6%)
C-561	76.3	Male	Negative
C-562	76.3	Female	Negative
C-563	76.4	Male	Negative
C-564	79	Female	BRAF:c.1799T>A,p.(Val600Glu)(70.2%)
C-565	76.5	Female	KRAS:c.38G>A,p.(Gly13Asp)(53.5%)
C-566	76.6	Female	KRAS:c.35G>A,p.(Gly12Asp)(38.8%)
C-567	76.6	Female	KRAS:c.35G>A,p.(Gly12Asp)(53.1%)
C-568	76.7	Male	KRAS:c.38G>A,p.(Gly13Asp)(44%)
C-569	76.8	Male	KRAS:c.35G>A,p.(Gly12Asp)(21.8%)
C-570	76.8	Male	Negative
C-571	79.1	Female	BRAF:c.1799T>A,p.(Val600Glu)(28.5%)
C-572	82.2	Male	BRAF:c.1799T>A,p.(Val600Glu)(19%)
C-573	76.9	Male	Negative
C-574	76.9	Female	KRAS:c.35G>A,p.(Gly12Asp)(60.6%)
C-575	77	Female	Negative
C-576	82.3	Male	BRAF:c.1799T>A,p.(Val600Glu)(31.2%)
C-577	77.1	Female	KRAS:c.35G>A,p.(Gly12Asp)(10.2%)
C-578	83.4	Male	BRAF:c.1799T>A,p.(Val600Glu)(25%)
C-579	77.2	Female	KRAS:c.34G>T,p.(Gly12Cys)(30.8%)
C-580	77.2	Female	Negative
C-581	77.3	Female	Negative
C-582	77.3	Male	Negative
C-583	77.3	Female	Negative
C-584	77.8	Male	Negative
C-585	83.8	Female	BRAF:c.1799T>A,p.(Val600Glu)(22.2%)
C-586	77.9	Female	Negative
C-587	84.2	Male	BRAF:c.1799T>A,p.(Val600Glu)(23.9%)
C-588	77.9	Female	Negative
C-589	78.1	Male	Negative
C-590	78.1	Male	Negative
C-591	78.1	Female	KRAS:c.35G>A,p.(Gly12Asp)(20.4%)
C-592	78.1	Male	Negative
C-593	78.2	Female	KRAS:c.35G>C,p.(Gly12Ala)(29.9%)
C-594	78.2	Male	KRAS:c.35G>T,p.(Gly12Val)(14%)
C-595	78.2	Male	KRAS:c.35G>T,p.(Gly12Val)(41.7%)
C-596	78.2	Male	KRAS:c.37G>T,p.(Gly13Cys)(56.2%)
C-597	78.4	Female	KRAS:c.35G>A,p.(Gly12Asp)(37.3%)
C-598	78.4	Male	KRAS:c.436G>A,p.(Ala146Thr)(59.4%)
C-599	78.6	Male	KRAS:c.35G>A,p.(Gly12Asp)(50.9%)
C-600	84.4	Female	BRAF:c.1799T>A,p.(Val600Glu)(35.8%)
C-601	78.7	Male	KRAS:c.35G>A,p.(Gly12Asp)(35.4%)
C-602	78.7	Female	KRAS:c.35G>T,p.(Gly12Val)(28.8%)
C-603	84.8	Female	BRAF:c.1799T>A,p.(Val600Glu)(24.9%)
C-604	78.9	Male	KRAS:c.35G>A,p.(Gly12Asp)(31.7%)
C-605	79	Female	Negative
C-606	85.3	Male	BRAF:c.1799T>A,p.(Val600Glu)(20.7%)
C-607	86.3	Male	BRAF:c.1799T>A,p.(Val600Glu)(36.9%)
C-608	79.5	Female	KRAS:c.35G>A,p.(Gly12Asp)(17.2%)
C-609	79.6	Female	KRAS:c.176C>A,p.(Ala59Glu)(21.6%)
C-610	79.6	Female	KRAS:c.35G>T,p.(Gly12Val)(49.2%)
C-611	79.9	Male	KRAS:c.35G>T,p.(Gly12Val)(26.4%)
C-612	80.2	Male	KRAS:c.34G>T,p.(Gly12Cys)(33.9%)
C-613	80.3	Female	Negative
C-614	80.4	Male	Negative
C-615	80.4	Male	KRAS:c.35G>C,p.(Gly12Ala)(34.3%)
C-616	80.4	Male	Negative
C-617	80.4	Male	KRAS:c.35G>T,p.(Gly12Val)(16.1%)
C-618	80.4	Female	KRAS:c.35G>T,p.(Gly12Val)(60.5%)
C-619	80.4	Male	KRAS:c.38G>A,p.(Gly13Asp)(37.9%)
C-620	80.6	Male	NRAS:c.179G>A,p.(Gly60Glu)(29%)
C-621	80.6	Male	KRAS:c.35G>A,p.(Gly12Asp)(25.3%)
C-622	80.6	Male	KRAS:c.35G>A,p.(Gly12Asp)(37.2%)
C-623	80.7	Male	NRAS:c.181C>A,p.(Gln61Lys)(56.2%)
C-624	80.8	Male	Negative
C-625	80.8	Female	KRAS:c.35G>T,p.(Gly12Val)(52.9%)
C-626	80.9	Male	KRAS:c.35G>A,p.(Gly12Asp)(13.2%)
C-627	80.9	Female	KRAS:c.35G>A,p.(Gly12Asp)(75.5%)
C-628	80.9	Female	KRAS:c.38G>A,p.(Gly13Asp)(52.3%)
C-629	81.1	Female	KRAS:c.35G>A,p.(Gly12Asp)(46.6%)
C-630	81.2	Female	KRAS:c.34G>A,p.(Gly12Ser)(42.1%)
C-631	81.2	Male	KRAS:c.34G>T,p.(Gly12Cys)(7.8%)
C-632	81.2	Female	Negative
C-633	81.4	Male	Negative
C-634	81.4	Male	KRAS:c.35G>A,p.(Gly12Asp)(36.4%)
C-635	81.7	Male	Negative
C-636	81.9	Male	KRAS:c.38G>A,p.(Gly13Asp)(58.7%)
C-637	86.6	Male	BRAF:c.1799T>A,p.(Val600Glu)(29.8%)
C-638	87.9	Female	BRAF:c.1799T>A,p.(Val600Glu)(35.3%)
C-639	82.3	Male	KRAS:c.35G>A,p.(Gly12Asp)(44.7%)
C-640	82.3	Male	KRAS:c.35G>C,p.(Gly12Ala)(61.9%)
C-641	82.4	Female	Negative
C-642	82.6	Female	KRAS:c.35G>T,p.(Gly12Val)(48.4%)
C-643	82.7	Female	KRAS:c.35G>A,p.(Gly12Asp)(51.6%)
C-644	82.7	Male	KRAS:c.35G>T,p.(Gly12Val)(33.9%)
C-645	82.8	Male	KRAS:c.35G>A,p.(Gly12Asp)(62.7%)
C-646	82.9	Male	Negative
C-647	82.9	Male	KRAS:c.35G>A,p.(Gly12Asp)(59.3%)
C-648	83.4	Male	KRAS:c.34G>T,p.(Gly12Cys)(60.7%)
C-649	56.8	Male	BRAF:c.1780G>A,p.(Asp594Asn)(29.5%)
C-650	83.4	Female	NRAS:c.34G>T,p.(Gly12Cys)(54.7%)
C-651	83.4	Male	KRAS:c.38G>A,p.(Gly13Asp)(55%)
C-652	83.6	Female	Negative
C-653	83.7	Male	Negative
C-654	83.7	Male	Negative
C-655	58.1	Male	BRAF:c.1406G>C,p.(Gly469Ala)(17.9%)
C-656	83.9	Female	KRAS:c.34G>T,p.(Gly12Cys)(15.7%)
C-657	84	Female	KRAS:c.35G>A,p.(Gly12Asp)(41.7%)
C-658	84	Female	KRAS:c.35G>A,p.(Gly12Asp)(61.5%)
C-659	84	Male	Negative
C-660	84.1	Male	KRAS:c.35G>T,p.(Gly12Val)(54.5%)
C-661	59.5	Male	BRAF:c.1780G>A,p.(Asp594Asn)(7.3%)
C-662	84.2	Male	Negative
C-663	84.3	Female	KRAS:c.35G>A,p.(Gly12Asp)(19%)
C-664	84.3	Male	KRAS:c.35G>A,p.(Gly12Asp)(37.8%)
C-665	84.4	Male	Negative
C-666	61.3	Male	BRAF:c.1406G>T,p.(Gly469Val)(38.6%)
C-667	84.4	Male	Negative
C-668	84.4	Female	KRAS:c.35G>T,p.(Gly12Val)(48.8%)
C-669	84.6	Male	Negative
C-670	84.7	Male	KRAS:c.35G>T,p.(Gly12Val)(56.5%)
C-671	84.7	Female	Negative
C-672	63.5	Female	KRAS:c.34G>T,p.(Gly12Cys)(59.1%); BRAF:c.1798G>A,p.(Val600Met)(8%)
C-673	84.8	Male	KRAS:c.35G>A,p.(Gly12Asp)(39.9%)
C-674	65.5	Male	BRAF:c.1406G>C,p.(Gly469Ala)(16.4%)
C-675	85.4	Female	KRAS:c.436G>A,p.(Ala146Thr)(92.1%)
C-676	85.7	Female	Negative
C-677	85.8	Male	Negative
C-678	85.9	Male	KRAS:c.38G>A,p.(Gly13Asp)(30.1%)
C-679	86.3	Female	KRAS:c.35G>A,p.(Gly12Asp)(43.3%)
C-680	70.1	Female	KRAS:c.436G>A,p.(Ala146Thr)(39.1%); BRAF:c.1406G>C,p.(Gly469Ala)(17.7%)
C-681	70.9	Male	KRAS:c.34G>T,p.(Gly12Cys)(19.5%); BRAF:c.1756G>A,p.(Glu586Lys)(5.2%)
C-682	86.6	Male	Negative
C-683	86.6	Male	KRAS:c.35G>T,p.(Gly12Val)(31.9%)
C-684	86.9	Male	KRAS:c.35G>T,p.(Gly12Val)(27.3%)
C-685	87.5	Male	NRAS:c.182A>G,p.(Gln61Arg)(38.9%)
C-686	87.5	Female	Negative
C-687	87.9	Male	Negative
C-688	76.8	Male	KRAS:c.34G>A,p.(Gly12Ser)(9.3%); BRAF:c.1781A>G,p.(Asp594Gly)(7.6%)
C-689	88.3	Female	KRAS:c.34G>T,p.(Gly12Cys)(40.7%)
C-690	88.8	Female	NRAS:c.35G>A,p.(Gly12Asp)(38.4%)
C-691	89.1	Female	KRAS:c.34G>A,p.(Gly12Ser)(28.5%)
C-692	90.3	Male	KRAS:c.38G>A,p.(Gly13Asp)(51.6%)
