# Supplementary material for: Molecular profiling of solid tumors by next-generation sequencing: an experience from a clinical laboratory
Source: Front Oncol. 2023 Jul 6;13:1208244. doi: 10.3389/fonc.2023.1208244 (PMC10359709; doi:10.3389/fonc.2023.1208244)
Supplement: Supplementary file 6 [file Table_6.xlsx]

## Sheet: Comprehensive panel
Patient ID	Tumor type	Variants
Comp-1	Oral	Negative
Comp-2	Parotid	Negative
Comp-3	Other - specify	Negative
Comp-4	Cervix	Negative
Comp-5	Bladder	Negative
Comp-6	Unknown primary	PIK3CA:c.1616C>G,p.(Pro539Arg)(8.6%); PIK3CA:c.1624G>A,p.(Glu542Lys)(8.6%)
Comp-7	Colon/Rectum	TP53:c.844C>T,p.(Arg282Trp)(40%)
Comp-8	Thyroid	RET:c.2753T>C,p.(Met918Thr)(41.2%)
Comp-9	Endometrial	Negative
Comp-10	Breast	Negative
Comp-11	Adenoid cystic carcinoma	PDGFRA:c.2522G>A,p.(Arg841Lys)(13%)
Comp-12	Thyroid	KRAS:c.37G>A,p.(Gly13Ser)(6.6%); RET:c.2753T>C,p.(Met918Thr)(95.5%); EGFR:c.2125G>A,p.(Glu709Lys)(17.6%); PTEN:c.733C>T,p.(Gln245*)(14.3%)
Comp-13	Breast	Negative
Comp-14	Ovary	Negative
Comp-15	Endometrial	PTEN:c.165delG,p.(?)(32.3%); PTEN:c.388C>G,p.(Arg130Gly)(32.5%)
Comp-16	Unknown primary	Negative
Comp-17	Endometrial	EGFR:c.2245G>A,p.(Glu749Lys)(5.5%)
Comp-18	Colon/Rectum	IDH1:c.394C>T,p.(Arg132Cys)(6.1%); NRAS:c.35G>A,p.(Gly12Asp)(41.3%)
Comp-19	Renal	Negative
Comp-20	Breast	Negative
Comp-21	Colon/Rectum	EGFR:c.2155G>A,p.(Gly719Ser)(5.9%); RET:c.2754G>A,p.(Met918Ile)(26.7%)
Comp-22	Ovary	BRAF:c.1798G>A,p.(Val600Met)(8.1%)
Comp-23	Mesothelioma	BRAF:c.1406G>A,p.(Gly469Glu)(14.8%)
Comp-24	Unknown primary	KIT:c.2410C>T,p.(Arg804Trp)(11.5%)
Comp-25	Breast	PIK3CA:c.1633G>A,p.(Glu545Lys)(58.3%)
Comp-26	Prostate	Negative
Comp-27	Ovary	Negative
Comp-28	Colon/Rectum	EGFR:c.2155G>A,p.(Gly719Ser)(41.4%)
Comp-29	Unknown primary	Negative
Comp-30	Breast	AKT1:c.49G>A,p.(Glu17Lys)(60.5%)
Comp-31	Ovary	Negative
Comp-32	Thyroid	RET:c.2753T>C,p.(Met918Thr)(24.4%)
Comp-33	Paraganglioma	Negative
Comp-34	Renal	Negative
Comp-35	Gastric	FBXW7:c.1436G>A,p.(Arg479Gln)(22.1%)
Comp-36	Breast	PIK3CA:c.1633G>A,p.(Glu545Lys)(62.5%)
Comp-37	Breast	Negative
Comp-38	Cholangiocarcinoma	Negative
Comp-39	Ovary	Negative
Comp-40	Colon/Rectum	KRAS:c.38G>A,p.(Gly13Asp)(49.4%)
Comp-41	Colon/Rectum	Negative
Comp-42	NSCLC	Negative
Comp-43	Endometrial	CTNNB1:c.98C>G,p.(Ser33Cys)(29.6%)
Comp-44	Thyroid	Negative
Comp-45	Breast	Negative
Comp-46	Renal	Negative
Comp-47	Leiomyosarcoma	Negative
Comp-48	Cervix	Negative
Comp-49	Oral	Negative
Comp-50	Bladder	KRAS:c.35G>A,p.(Gly12Asp)(45.7%)
Comp-51	GE junction	Negative
Comp-52	Endometrial	PTEN:c.388C>G,p.(Arg130Gly)(89.1%)
Comp-53	Breast	Negative
Comp-54	Prostate	Negative
Comp-55	Pancreas	KRAS:c.35G>T,p.(Gly12Val)(26.5%)
Comp-56	Ovary	Negative
Comp-57	Ovary	BRAF:c.1799T>A,p.(Val600Glu)(57.8%)
Comp-58	Breast	PIK3CA:c.1633G>A,p.(Glu545Lys)(16%)
Comp-59	Gastric	Negative
Comp-60	Pancreas	Negative
Comp-61	Melanoma	CDKN2A:c.238C>T,p.(Arg80*)(87.9%)
Comp-62	Sarcoma	Negative
Comp-63	Colon/Rectum	Negative
Comp-64	Neuroendocrine	Negative
Comp-65	Breast	PIK3CA:c.3140A>G,p.(His1047Arg)(41%)
Comp-66	Breast	Negative
Comp-67	NSCLC	EGFR:c.2236_2250del,p.(Glu746_Ala750del)(42%); EGFR:c.2369C>T,p.(Thr790Met)(14%)
Comp-68	NSCLC	IDH1:c.394C>T,p.(Arg132Cys)(29.8%)
Comp-69	Sarcoma	Negative
Comp-70	Breast	PIK3CA:c.1624G>A,p.(Glu542Lys)(61.3%)
Comp-71	Pancreas	KRAS:c.35G>T,p.(Gly12Val)(34.1%)
Comp-72	Breast	PIK3CA:c.3140A>G,p.(His1047Arg)(31%); KRAS:c.34G>A,p.(Gly12Ser)(34.4%)
Comp-73	Esophagus	Negative
Comp-74	NSCLC	Negative
Comp-75	Pancreas	KRAS:c.180_181inv,p.(Gln61Lys)(24.5%)
Comp-76	GE junction	Negative
Comp-77	Adenoid cystic carcinoma	Negative
Comp-78	Parotid	PIK3CA:c.3140A>G,p.(His1047Arg)(64.8%); HRAS:c.182A>G,p.(Gln61Arg)(61.5%)
Comp-79	Breast	PDGFRA:c.2540C>T,p.(Ser847Leu)(5%)
Comp-80	Breast	Negative
Comp-81	NSCLC	KRAS:c.437C>T,p.(Ala146Val)(25.3%)
Comp-82	NSCLC	KRAS:c.35G>A,p.(Gly12Asp)(16.6%); CDKN2A:c.238C>T,p.(Arg80*)(15.5%)
Comp-83	Colon/Rectum	Negative
Comp-84	Breast	AKT1:c.49G>A,p.(Glu17Lys)(52%)
Comp-85	Cervix	KRAS:c.35G>A,p.(Gly12Asp)(31.7%); SMAD4:c.1082G>A,p.(Arg361His)(13.1%)
Comp-86	NSCLC	Negative
Comp-87	Breast	PIK3CA:c.3140A>G,p.(His1047Arg)(61.1%)
Comp-88	Bladder	KRAS:c.35G>A,p.(Gly12Asp)(26.7%)
Comp-89	Oral	Negative
Comp-90	Thyroid	KRAS:c.34G>C,p.(Gly12Arg)(40.9%)
Comp-91	Ovary	KRAS:c.34G>C,p.(Gly12Arg)(16.4%)
Comp-92	Esophagus	Negative
Comp-93	Sarcoma	IDH1:c.394C>T,p.(Arg132Cys)(23.6%)
Comp-94	GE junction	Negative
Comp-95	Sarcoma	Negative
Comp-96	Oral	Negative
Comp-97	Endometrial	Negative
Comp-98	Endometrial	Negative
Comp-99	Parotid	Negative
Comp-100	GE junction	Negative
Comp-101	Esophagus	Negative
Comp-102	Neuroendocrine	PTEN:c.955_958delACTT,p.(Thr319*)(43.7%)
Comp-103	Unknown primary	Negative
Comp-104	Esophagus	Negative
Comp-105	Appendix	KRAS:c.35G>C,p.(Gly12Ala)(34.8%); IDH1:c.394C>T,p.(Arg132Cys)(8.8%)
Comp-106	Endometrial	AKT1:c.49G>A,p.(Glu17Lys)(71.7%)
Comp-107	Glioblastoma	Negative
Comp-108	Skin-squamous	Negative
Comp-109	Breast	Negative
Comp-110	Colon/Rectum	KRAS:c.35G>A,p.(Gly12Asp)(43.5%)
Comp-111	Gastric	Negative
Comp-112	NSCLC	Negative
Comp-113	Mesothelioma	Negative
Comp-114	Colon/Rectum	KRAS:c.35G>A,p.(Gly12Asp)(13.2%); BRAF:c.1799T>A,p.(Val600Glu)(20.6%)
Comp-115	Breast	IDH1:c.395G>A,p.(Arg132His)(19.3%); NRAS:c.182A>G,p.(Gln61Arg)(29.1%); ALK:c.3824G>A,p.(Arg1275Gln)(22.4%); AKT1:c.49G>A,p.(Glu17Lys)(16.8%)
Comp-116	Thyroid	PTEN:c.867delA,p.(Val290*)(66%)
Comp-117	Paraganglioma	Negative
Comp-118	Breast	Negative
Comp-119	Renal	Negative
Comp-120	Colon/Rectum	KRAS:c.436G>A,p.(Ala146Thr)(22.6%)
Comp-121	NSCLC	KRAS:c.35G>A,p.(Gly12Asp)(55%)
Comp-122	Colon/Rectum	Negative
Comp-123	Colon/Rectum	NRAS:c.182A>G,p.(Gln61Arg)(33.6%); FBXW7:c.1393C>T,p.(Arg465Cys)(27.2%)
Comp-124	Melanoma	Negative
Comp-125	Parotid	FLT3:c.1352C>T,p.(Ser451Phe)(6.3%)
Comp-126	Colon/Rectum	Negative
Comp-127	Colon/Rectum	Negative
Comp-128	Melanoma	BRAF:c.1799T>A,p.(Val600Glu)(34.3%)
Comp-129	NSCLC	KRAS:c.35G>T,p.(Gly12Val)(59.4%)
Comp-130	Melanoma	TP53:c.825T>G,p.(Cys275Trp)(92.7%); CDKN2A:c.238C>T,p.(Arg80*)(91.1%); EGFR:c.2203G>A,p.(Gly735Ser)(22.7%)
Comp-131	Breast	EGFR:c.2590G>A,p.(Ala864Thr)(19.9%)
Comp-132	Endometrial	Negative
Comp-133	Ovary	Negative
Comp-134	NSCLC	Negative
Comp-135	Melanoma	NRAS:c.182A>G,p.(Gln61Arg)(42.4%)
Comp-136	Colon/Rectum	KRAS:c.35G>A,p.(Gly12Asp)(21.9%); AKT1:c.49G>A,p.(Glu17Lys)(45.5%)
Comp-137	Adenoid cystic carcinoma	Negative
Comp-138	Breast	RET:c.2754G>A,p.(Met918Ile)(6%)
Comp-139	Endometrial	PIK3CA:c.3140A>G,p.(His1047Arg)(69.1%)
Comp-140	Breast	Negative
Comp-141	Pancreas	Negative
Comp-142	Pancreas	KRAS:c.34G>C,p.(Gly12Arg)(14.4%)
Comp-143	Breast	TP53:c.733G>A,p.(Gly245Ser)(32%); TP53:c.808T>C,p.(Phe270Leu)(19.6%); PIK3CA:c.3140A>G,p.(His1047Arg)(17.4%)
Comp-144	NSCLC	Negative
Comp-145	Other - specify	Negative
Comp-146	Esophagus	TP53:c.743G>A,p.(Arg248Gln)(42.2%); PIK3CA:c.1624G>A,p.(Glu542Lys)(18.3%)
Comp-147	Prostate	Negative
Comp-148	Breast	Negative
Comp-149	Breast	TP53:c.844C>T,p.(Arg282Trp)(37.7%)
Comp-150	Breast	TP53:c.818G>T,p.(Arg273Leu)(64.3%)
Comp-151	Colon/Rectum	APC:c.4057G>T,p.(Glu1353*)(54.3%)
Comp-152	Breast	TP53:c.330_334delTCTGG,p.(Gly112Leufs*35)(83.9%)
Comp-153	Other - specify	KRAS:c.35G>A,p.(Gly12Asp)(38.8%); TP53:c.569C>T,p.(Pro190Leu)(29.2%)
Comp-154	Breast	Negative
Comp-155	Breast	ATM:c.5178-2_5178-1insT(59.9%)
Comp-156	Thyroid	RET:c.2753T>C,p.(Met918Thr)(83.3%); ATM:c.5250G>A,p.(Trp1750*)(10.1%)
Comp-157	Breast	PDGFRA:c.2522G>A,p.(Arg841Lys)(20.6%); CTNNB1:c.94G>A,p.(Asp32Asn)(12.8%)
Comp-158	Pancreas	Negative
Comp-159	Neuroendocrine	BRAF:c.1799T>A,p.(Val600Glu)(77.9%)
Comp-160	Unknown primary	PIK3CA:c.1258T>C,p.(Cys420Arg)(55.9%); KRAS:c.34G>T,p.(Gly12Cys)(55.1%); IDH1:c.394C>T,p.(Arg132Cys)(45.6%)
Comp-161	NSCLC	Negative
Comp-162	NSCLC	Negative
Comp-163	NSCLC	TP53:c.472C>T,p.(Arg158Cys)(56.5%)
Comp-164	NSCLC	Negative
Comp-165	NSCLC	ERBB2:c.2313_2324dup,p.(Tyr772_Ala775dup)(67.7%)
Comp-166	Unknown primary	TP53:c.469G>T,p.(Val157Phe)(45.7%)
Comp-167	NSCLC	TP53:c.745A>T,p.(Arg249Trp)(21.9%); KRAS:c.34G>T,p.(Gly12Cys)(11%)
Comp-168	NSCLC	Negative
Comp-169	Colon/Rectum	NRAS:c.37G>C,p.(Gly13Arg)(56.9%)
Comp-170	Pancreas	KRAS:c.35G>T,p.(Gly12Val)(10.5%)
Comp-171	Sarcoma	TP53:c.450_452delACCinsT,p.(Pro152Alafs*28)(31.6%)
Comp-172	Breast	Negative
Comp-173	Endometrial	Negative
Comp-174	Other - specify	Negative
Comp-175	Pancreas	KRAS:c.35G>T,p.(Gly12Val)(15%)
Comp-176	Pancreas	Negative
Comp-177	Unknown primary	KRAS:c.34G>T,p.(Gly12Cys)(34.3%)
Comp-178	Endometrial	Negative
Comp-179	NSCLC	Negative
Comp-180	Pancreas	KRAS:c.34G>C,p.(Gly12Arg)(41.9%)
Comp-181	NSCLC	Negative
Comp-182	Breast	AKT1:c.49G>A,p.(Glu17Lys)(91.2%)
Comp-183	Breast	Negative
Comp-184	Breast	Negative
Comp-185	Breast	TP53:c.797G>A,p.(Gly266Glu)(71.5%); PIK3CA:c.3140A>G,p.(His1047Arg)(51.8%)
Comp-186	Ovary	KRAS:c.35G>C,p.(Gly12Ala)(34.5%)
Comp-187	Cholangiocarcinoma	IDH1:c.394C>T,p.(Arg132Cys)(33.8%); RET:c.1859G>A,p.(Cys620Tyr)(10.4%); EGFR:c.2320G>A,p.(Val774Met)(93.9%); CTNNB1:c.110C>T,p.(Ser37Phe)(10.6%)
Comp-188	Ovary	NRAS:c.182A>G,p.(Gln61Arg)(69.6%)
Comp-189	Colon/Rectum	PIK3CA:c.3140A>G,p.(His1047Arg)(26.4%); NRAS:c.38G>A,p.(Gly13Asp)(11.5%)
Comp-190	NSCLC	ERBB2:c.2313_2324dup,p.(Tyr772_Ala775dup)(82.7%)
Comp-191	Colon/Rectum	KRAS:c.436G>A,p.(Ala146Thr)(51.9%)
Comp-192	Breast	TP53:c.844C>T,p.(Arg282Trp)(44.9%); PIK3CA:c.3140A>G,p.(His1047Arg)(6.2%)
Comp-193	Pancreas	TP53:c.733G>A,p.(Gly245Ser)(34.3%); KRAS:c.35G>T,p.(Gly12Val)(18%)
Comp-194	Ovary	TP53:c.722C>T,p.(Ser241Phe)(80%)
Comp-195	Pancreas	KRAS:c.34G>C,p.(Gly12Arg)(24.5%); TP53:c.586C>T,p.(Arg196*)(22.9%)
Comp-196	Breast	PIK3CA:c.3140A>G,p.(His1047Arg)(29.7%)
Comp-197	Cervix	Negative
Comp-198	GE junction	Negative
Comp-199	Pancreas	KRAS:c.35G>A,p.(Gly12Asp)(15%)
Comp-200	Unknown primary	TP53:c.844C>G,p.(Arg282Gly)(82.2%)
Comp-201	Colon/Rectum	KRAS:c.436G>A,p.(Ala146Thr)(13.4%)
Comp-202	Breast	TP53:c.1024C>T,p.(Arg342*)(16.1%); PIK3CA:c.1035T>A,p.(Asn345Lys)(24.9%)
Comp-203	Pancreas	KRAS:c.35G>A,p.(Gly12Asp)(25.1%)
Comp-204	Pancreas	EGFR:c.2351C>T,p.(Ser784Phe)(6%); EGFR:c.2299G>A,p.(Ala767Thr)(5.4%)
Comp-205	Breast	Negative
Comp-206	Esophagus	Negative
Comp-207	Ovary	Negative
Comp-208	NSCLC	KRAS:c.34G>T,p.(Gly12Cys)(28%)
Comp-209	Neuroendocrine	Negative
Comp-210	Breast	PIK3CA:c.3140A>G,p.(His1047Arg)(26.4%)
Comp-211	Cervix	Negative
Comp-212	Ovary	TP53:c.753_756delCCTC,p.(Leu252Profs*92)(78.7%); EGFR:c.2249C>T,p.(Ala750Val)(14%)
Comp-213	Pancreas	Negative
Comp-214	Unknown primary	Negative
Comp-215	Colon/Rectum	KRAS:c.436G>A,p.(Ala146Thr)(60.2%)
Comp-216	Colon/Rectum	KRAS:c.182A>G,p.(Gln61Arg)(50.6%)
Comp-217	Breast	Negative
Comp-218	Breast	Negative
Comp-219	NSCLC	Negative
Comp-220	Pancreas	KRAS:c.35G>T,p.(Gly12Val)(45.7%)
Comp-221	Gastric	TP53:c.853G>A,p.(Glu285Lys)(57.9%)
Comp-222	Breast	PIK3CA:c.1633G>A,p.(Glu545Lys)(77.5%)
Comp-223	Colon/Rectum	KRAS:c.34_35delGGinsTT,p.(Gly12Phe)(44.7%)
Comp-224	Colon/Rectum	Negative
Comp-225	NSCLC	KRAS:c.34_35delGGinsTT,p.(Gly12Phe)(33.6%)
Comp-226	Colon/Rectum	Negative
Comp-227	Sarcoma	Negative
Comp-228	Colon/Rectum	Negative
Comp-229	Pancreas	NRAS:c.182A>G,p.(Gln61Arg)(6.8%)
Comp-230	Ovary	TP53:c.842dupA,p.(Asp281Glufs*25)(91.6%)
Comp-231	Thyroid	Negative
Comp-232	Breast	Negative
Comp-233	Breast	PIK3CA:c.1035T>A,p.(Asn345Lys)(32.8%)
Comp-234	Gastric	Negative
Comp-235	Leiomyosarcoma	PDGFRA:c.2522G>A,p.(Arg841Lys)(5.8%)
Comp-236	Leiomyosarcoma	Negative
Comp-237	NSCLC	KRAS:c.34_35delGGinsTT,p.(Gly12Phe)(10.2%)
Comp-238	Melanoma	Negative
Comp-239	Leiomyosarcoma	TP53:c.524G>A,p.(Arg175His)(96.4%)
Comp-240	Gastric	Negative
Comp-241	Breast	PIK3CA:c.1634A>G,p.(Glu545Gly)(73.3%)
Comp-242	Colon/Rectum	PIK3CA:c.1636C>A,p.(Gln546Lys)(40.8%); KRAS:c.34G>A,p.(Gly12Ser)(42.7%)
Comp-243	Colon/Rectum	KRAS:c.35G>A,p.(Gly12Asp)(28.2%); PIK3CA:c.263G>A,p.(Arg88Gln)(25.2%)
Comp-244	Colon/Rectum	KRAS:c.182A>T,p.(Gln61Leu)(47%); PTEN:c.388C>T,p.(Arg130*)(37.9%)
Comp-245	Colon/Rectum	KRAS:c.34G>T,p.(Gly12Cys)(25.5%)
Comp-246	Colon/Rectum	SMAD4:c.1081C>T,p.(Arg361Cys)(44.2%); APC:c.3927_3931delAAAGA,p.(Glu1309Aspfs*4)(28.9%); APC:c.3340C>T,p.(Arg1114*)(21.9%)
Comp-247	Colon/Rectum	TP53:c.817C>T,p.(Arg273Cys)(88.7%); APC:c.3871C>T,p.(Gln1291*)(65.4%)
Comp-248	Colon/Rectum	APC:c.4666dupA,p.(Thr1556Asnfs*3)(94.4%); PTEN:c.955_958delACTT,p.(Thr319*)(89.1%); TP53:c.524G>A,p.(Arg175His)(85.9%); KRAS:c.35G>A,p.(Gly12Asp)(43.9%)
Comp-249	GE junction	TP53:c.524G>A,p.(Arg175His)(48.6%)
Comp-250	Other - specify	Negative
Comp-251	Endometrial	TP53:c.743G>A,p.(Arg248Gln)(85.1%)
Comp-252	Endometrial	TP53:c.268delT,p.(Ser90Profs*33)(47%)
Comp-253	Cholangiocarcinoma	Negative
Comp-254	Breast	TP53:c.261_264delAGCC,p.(Ala88Profs*34)(27.8%); SMAD4:c.1193G>A,p.(Trp398*)(6.7%); TP53:c.856G>A,p.(Glu286Lys)(5.9%); EGFR:c.2369C>T,p.(Thr790Met)(5.2%)
Comp-255	Ovary	Negative
Comp-256	Breast	Negative
Comp-257	Bladder	TP53:c.734G>C,p.(Gly245Ala)(55.5%); SMAD4:c.1081C>T,p.(Arg361Cys)(40.3%)
Comp-258	Parotid	ERBB2:c.2329G>T,p.(Val777Leu)(19.1%)
Comp-259	Pancreas	KRAS:c.34G>C,p.(Gly12Arg)(20.2%); TP53:c.733G>A,p.(Gly245Ser)(11.2%)
Comp-260	Cholangiocarcinoma	Negative
Comp-261	NSCLC	Negative
Comp-262	Colon/Rectum	Negative
Comp-263	Cholangiocarcinoma	Negative
Comp-264	NSCLC	KRAS:c.34G>T,p.(Gly12Cys)(53%)
Comp-265	Gastric	TP53:c.1024C>T,p.(Arg342*)(32.5%); ERBB2:c.2524G>A,p.(Val842Ile)(18.9%)
Comp-266	GE junction	TP53:c.820G>T,p.(Val274Phe)(73.6%)
Comp-267	Cholangiocarcinoma	KRAS:c.35G>A,p.(Gly12Asp)(27%); TP53:c.817C>T,p.(Arg273Cys)(23.1%)
Comp-268	Sarcoma	Negative
Comp-269	NSCLC	KRAS:c.35G>T,p.(Gly12Val)(32.4%)
Comp-270	Colon/Rectum	NRAS:c.183A>C,p.(Gln61His)(68.5%); TP53:c.586C>T,p.(Arg196*)(66.6%)
Comp-271	Renal	Negative
Comp-272	Cholangiocarcinoma	Negative
Comp-273	Breast	Negative
Comp-274	Esophagus	Negative
Comp-275	Hepatic	Negative
Comp-276	Bladder	Negative
Comp-277	Skin-squamous	PIK3CA:c.1624G>A,p.(Glu542Lys)(23.7%)
Comp-278	Pancreas	KRAS:c.35G>A,p.(Gly12Asp)(21.9%); TP53:c.818G>A,p.(Arg273His)(16%)
Comp-279	GE junction	TP53:c.376-2A>G(31.7%)
Comp-280	Pancreas	KRAS:c.35G>A,p.(Gly12Asp)(57.7%)
Comp-281	Hepatic	Negative
Comp-282	Esophagus	Negative
Comp-283	Colon/Rectum	PTEN:c.388C>T,p.(Arg130*)(68.9%); KRAS:c.183A>C,p.(Gln61His)(42.2%); APC:c.4359delT,p.(Asn1455Ilefs*18)(32.1%)
Comp-284	NSCLC	TP53:c.997delC,p.(Arg333Valfs*12)(74.8%); RB1:c.1700C>G,p.(Ser567*)(74.2%)
Comp-285	Adenoid cystic carcinoma	Negative
Comp-286	Breast	Negative
Comp-287	Breast	TP53:c.215delCinsGT,p.(Pro72Argfs*77)(78.2%)
Comp-288	Mesothelioma	Negative
Comp-289	Other - specify	Negative
Comp-290	Renal	PTEN:c.372T>A,p.(Cys124*)(28.9%)
Comp-291	GE junction	TP53:c.613T>C,p.(Tyr205His)(35.3%)
Comp-292	Breast	Negative
Comp-293	Pancreas	KRAS:c.35G>A,p.(Gly12Asp)(18.2%); TP53:c.710T>A,p.(Met237Lys)(14.5%)
Comp-294	Neuroendocrine	Negative
Comp-295	Thyroid	TP53:c.1024C>T,p.(Arg342*)(81.3%)
Comp-296	Other - specify	Negative
Comp-297	Colon/Rectum	TP53:c.880G>T,p.(Glu294*)(78.6%)
Comp-298	Renal	Negative
Comp-299	Thyroid	BRAF:c.1799T>A,p.(Val600Glu)(53.3%); AKT1:c.49G>A,p.(Glu17Lys)(37.5%)
Comp-300	Pancreas	RET:c.2672C>A,p.(Ser891*)(7.5%); KRAS:c.35G>A,p.(Gly12Asp)(5.7%)
Comp-301	Other-specify	CDKN2A:c.151-1G>T(66%); TP53:c.402T>A,p.(Phe134Leu)(56%)
Comp-302	Pancreas	TP53:c.646G>A,p.(Val216Met)(25.2%); KRAS:c.34G>C,p.(Gly12Arg)(9.1%); SMAD4:c.1351_1375del,p.(Ala451Leufs*17)(7.2%)
Comp-303	Thyroid	BRAF:c.1799T>A,p.(Val600Glu)(43%); AKT1:c.49G>A,p.(Glu17Lys)(33.5%); EGFR:c.2105C>T,p.(Ala702Val)(5.2%)
Comp-304	Breast	PIK3CA:c.1624G>A,p.(Glu542Lys)(25.7%); TP53:c.743G>A,p.(Arg248Gln)(17.2%); EGFR:c.2351C>T,p.(Ser784Phe)(6.7%)
Comp-305	Endometrial	TP53:c.723delC,p.(Cys242Alafs*5)(69.2%)
Comp-306	Bladder	Negative
Comp-307	Colon/Rectum	Negative
Comp-308	Glioblastoma	PTEN:c.955_958delACTT,p.(Thr319*)(82.5%); TP53:c.686_687delGT,p.(Cys229Tyrfs*10)(48.4%); TP53:c.742C>T,p.(Arg248Trp)(46.3%)
Comp-309	Colon/Rectum	TP53:c.581T>G,p.(Leu194Arg)(70.9%)
Comp-310	Colon/Rectum	APC:c.4478_4479delCG,p.(Thr1493Argfs*20)(70.3%); KRAS:c.35G>A,p.(Gly12Asp)(35.4%)
Comp-311	NSCLC	TP53:c.472C>G,p.(Arg158Gly)(68%)
Comp-312	Colon/Rectum	TP53:c.844C>T,p.(Arg282Trp)(63.5%); KRAS:c.351A>C,p.(Lys117Asn)(62.7%)
Comp-313	Ovary	Negative
Comp-314	Adenoid cystic carcinoma	Negative
Comp-315	Breast	PIK3CA:c.3140A>G,p.(His1047Arg)(79.8%)
Comp-316	Bladder	Negative
Comp-317	Colon/Rectum	HRAS:c.34G>A,p.(Gly12Ser)(72.7%); TP53:c.743G>A,p.(Arg248Gln)(69.7%)
Comp-318	Small Bowel	TP53:c.1009C>T,p.(Arg337Cys)(59.5%); APC:c.4348C>T,p.(Arg1450*)(40.7%)
Comp-319	Thyroid	Negative
Comp-320	Other - specify	PIK3CA:c.1624G>A,p.(Glu542Lys)(46.2%); PTEN:c.1003C>T,p.(Arg335*)(6.2%)
Comp-321	Colon/Rectum	NRAS:c.181C>A,p.(Gln61Lys)(56.2%)
Comp-322	Thyroid	BRAF:c.1799T>A,p.(Val600Glu)(38.4%)
Comp-323	Oral	Negative
Comp-324	Breast	Negative
Comp-325	Adenoid cystic carcinoma	Negative
Comp-326	Adenoid cystic carcinoma	Negative
Comp-327	Adenoid cystic carcinoma	PTEN:c.756dupT,p.(Ile253Tyrfs*45)(31.6%); CTNNB1:c.98C>T,p.(Ser33Phe)(19%)
Comp-328	Endometrial	TP53:c.762dupC,p.(Ile255Hisfs*9)(67.2%); KRAS:c.35G>A,p.(Gly12Asp)(42.6%)
Comp-329	Pancreas	Negative
Comp-330	Renal	Negative
Comp-331	Bladder	Negative
Comp-332	Breast	Negative
Comp-333	Thyroid	TP53:c.626_627delGA,p.(Arg209Lysfs*6)(66%)
Comp-334	Endometrial	PTEN:c.388C>G,p.(Arg130Gly)(41.7%); PIK3CA:c.3140A>G,p.(His1047Arg)(25.3%)
Comp-335	Endometrial	KRAS:c.29_31dupGAG,p.(Gly10dup)(24.2%); TP53:c.404G>T,p.(Cys135Phe)(37.8%); FGFR2:c.755C>G,p.(Ser252Trp)(35.3%)
Comp-336	Pancreas	TP53:c.814G>A,p.(Val272Met)(74%); KRAS:c.35G>T,p.(Gly12Val)(33.4%)
Comp-337	NSCLC	KIT:c.1735_1737delGAT,p.(Asp579del)(44.6%)
Comp-338	Breast	Negative
Comp-339	Breast	TP53:c.637C>T,p.(Arg213*)(55.2%)
Comp-340	Anaplastic astrocytoma	TP53:c.403T>C,p.(Cys135Arg)(59%); IDH1:c.395G>A,p.(Arg132His)(29.7%)
Comp-341	Glioblastoma	EGFR:c.866C>T,p.(Ala289Val)(19.5%)
Comp-342	Colon/Rectum	APC:c.4464delA,p.(Leu1488Phefs*19)(31.8%); KRAS:c.35G>A,p.(Gly12Asp)(25.3%)
Comp-343	Colon/Rectum	TP53:c.818G>A,p.(Arg273His)(41.5%); KRAS:c.35G>A,p.(Gly12Asp)(40.4%); APC:c.4328delC,p.(Pro1443Leufs*30)(29.8%); FBXW7:c.1436G>A,p.(Arg479Gln)(17.5%)
Comp-344	Oral	NOTCH1:c.7400C>A,p.(Ser2467*)(61.5%); PIK3CA:c.3140A>G,p.(His1047Arg)(12.7%)
Comp-345	Unknown primary	Negative
Comp-346	Other - specify	Negative
Comp-347	Prostate	Negative
Comp-348	Unknown primary	Negative
Comp-349	Unknown primary	RB1:c.1999G>T,p.(Glu667*)(74.2%); TP53:c.715A>G,p.(Asn239Asp)(68%); PIK3CA:c.1637A>T,p.(Gln546Leu)(34.2%)
Comp-350	NSCLC	KRAS:c.35G>T,p.(Gly12Val)(72.1%)
Comp-351	Endometrial	FBXW7:c.1436G>A,p.(Arg479Gln)(16.4%); TP53:c.743G>A,p.(Arg248Gln)(13.2%)
Comp-352	Breast	TP53:c.844C>T,p.(Arg282Trp)(82.1%)
Comp-353	Anaplastic astrocytoma	IDH1:c.395G>A,p.(Arg132His)(50.4%)
Comp-354	Thyroid	Negative
Comp-355	Ovary	KIT:c.1588G>A,p.(Val530Ile)(52.4%)
Comp-356	Cervix	Negative
Comp-357	Glioblastoma	Negative
Comp-358	Breast	EGFR:c.2245G>A,p.(Glu749Lys)(15.7%); CTNNB1:c.134C>T,p.(Ser45Phe)(12.2%)
Comp-359	Anaplastic astrocytoma	TP53:c.817C>T,p.(Arg273Cys)(85.9%); IDH1:c.395G>A,p.(Arg132His)(39.4%)
Comp-360	NSCLC	KRAS:c.35G>C,p.(Gly12Ala)(6.4%)
Comp-361	Unknown primary	TP53:c.662_663delAG,p.(Glu221Alafs*3)(47.9%)
Comp-362	Endometrial	Negative
Comp-363	Pancreas	KRAS:c.35G>A,p.(Gly12Asp)(46.5%)
Comp-364	Breast	PIK3CA:c.1624G>A,p.(Glu542Lys)(67%)
Comp-365	Renal	Negative
Comp-366	Other - specify	IDH1:c.395G>A,p.(Arg132His)(46.9%); PIK3CA:c.241G>A,p.(Glu81Lys)(41.6%)
Comp-367	Thyroid	BRAF:c.1799T>A,p.(Val600Glu)(44.9%)
Comp-368	NSCLC	TP53:c.734G>C,p.(Gly245Ala)(9.1%)
Comp-369	Colon/Rectum	TP53:c.743G>A,p.(Arg248Gln)(59.1%)
Comp-370	Colon/Rectum	KRAS:c.37G>C,p.(Gly13Arg)(49.8%); TP53:c.524G>A,p.(Arg175His)(46.1%); APC:c.3340C>T,p.(Arg1114*)(11.3%); SMAD4:c.1081C>T,p.(Arg361Cys)(8.7%); SMAD4:c.1571G>A,p.(Trp524*)(6.2%)
Comp-371	Melanoma	BRAF:c.1799T>A,p.(Val600Glu)(56.4%); RB1:c.607+2T>C(51%)
Comp-372	Unknown primary	MET:c.3742T>C,p.(Tyr1248His)(30.5%); BRAF:c.1799T>A,p.(Val600Glu)(13.1%)
Comp-373	Colon/Rectum	TP53:c.818G>A,p.(Arg273His)(62.5%); PTEN:c.1003C>T,p.(Arg335*)(41.9%); KRAS:c.35G>C,p.(Gly12Ala)(37.8%)
Comp-374	Thyroid	BRAF:c.1799T>A,p.(Val600Glu)(17.1%)
Comp-375	Colon/Rectum	APC:c.4135G>T,p.(Glu1379*)(60.5%); TP53:c.818G>A,p.(Arg273His)(49.6%)
Comp-376	Colon/Rectum	Negative
Comp-377	Colon/Rectum	Negative
Comp-378	Breast	PIK3CA:c.1633G>A,p.(Glu545Lys)(39.1%)
Comp-379	Endometrial	Negative
Comp-380	Parotid	Negative
Comp-381	Breast	PTEN:c.955_958delACTT,p.(Thr319*)(82.5%); PIK3CA:c.1258T>C,p.(Cys420Arg)(43.5%)
Comp-382	Cholangiocarcinoma	Negative
Comp-383	Breast	Negative
Comp-384	Cervix	Negative
Comp-385	Breast	PIK3CA:c.3140A>G,p.(His1047Arg)(25.3%)
Comp-386	Pancreas	KRAS:c.35G>A,p.(Gly12Asp)(23.4%)
Comp-387	Ovary	TP53:c.524G>A,p.(Arg175His)(54.6%); FGFR2:c.755C>G,p.(Ser252Trp)(24.5%)
Comp-388	GE junction	Negative
Comp-389	Other - specify	Negative
Comp-390	Colon/Rectum	APC:c.3925G>T,p.(Glu1309*)(60.1%); TP53:c.856G>A,p.(Glu286Lys)(44.6%)
Comp-391	Colon/Rectum	SMAD4:c.1081C>T,p.(Arg361Cys)(29%); EGFR:c.323G>A,p.(Arg108Lys)(16%)
Comp-392	Gallbladder	Negative
Comp-393	Breast	TP53:c.742_743delCGinsTT,p.(Arg248Leu)(43.9%); PIK3CA:c.1357G>C,p.(Glu453Gln)(20.8%)
Comp-394	Colon/Rectum	APC:c.3340C>T,p.(Arg1114*)(90.3%); TP53:c.722C>T,p.(Ser241Phe)(52.6%)
Comp-395	Ovary	Negative
Comp-396	Thyroid	Negative
Comp-397	Thyroid	TP53:c.743G>A,p.(Arg248Gln)(24.4%); BRAF:c.1799T>A,p.(Val600Glu)(15.5%); FBXW7:c.1153C>T,p.(Arg385Cys)(5.7%)
Comp-398	Sarcoma	TP53:c.844C>T,p.(Arg282Trp)(24.7%)
Comp-399	Renal	VHL:c.266T>C,p.(Leu89Pro)(24.2%)
Comp-400	Ovary	TP53:c.839G>T,p.(Arg280Ile)(59.5%)
Comp-401	Other - specify	PIK3CA:c.3073A>T,p.(Thr1025Ser)(10.4%)
Comp-402	Breast	TP53:c.1006G>T,p.(Glu336*)(26.7%)
Comp-403	NSCLC	KRAS:c.35G>A,p.(Gly12Asp)(23.6%)
Comp-404	Breast	Negative
Comp-405	NSCLC	Negative
Comp-406	Endometrial	PTEN:c.388C>G,p.(Arg130Gly)(83.4%); CTNNB1:c.94G>T,p.(Asp32Tyr)(54.9%)
Comp-407	Endometrial	TP53:c.818G>A,p.(Arg273His)(68.4%)
Comp-408	prostate	Negative
Comp-409	Endometrial	AKT1:c.49G>A,p.(Glu17Lys)(70.8%)
Comp-410	NSCLC	Negative
Comp-411	Gallbladder	ATM:c.8189A>C,p.(Gln2730Pro)(15.9%)
Comp-412	Esophagus	TP53:c.817C>T,p.(Arg273Cys)(49.5%); CTNNB1:c.97T>C,p.(Ser33Pro)(43%)
Comp-413	Pancreas	KRAS:c.35G>T,p.(Gly12Val)(31.2%)
Comp-414	Gallbladder	Negative
Comp-415	Colon/Rectum	TP53:c.527G>A,p.(Cys176Tyr)(74%); APC:c.3340C>T,p.(Arg1114*)(69.6%); NRAS:c.181C>A,p.(Gln61Lys)(40.6%)
Comp-416	Colon/Rectum	Negative
Comp-417	Colon/Rectum	KRAS:c.35G>T,p.(Gly12Val)(46.8%); PIK3CA:c.1633G>A,p.(Glu545Lys)(40.3%)
Comp-418	Colon/Rectum	APC:c.4348C>T,p.(Arg1450*)(73.2%); KRAS:c.35G>A,p.(Gly12Asp)(50.5%); RET:c.1859G>A,p.(Cys620Tyr)(5.6%)
Comp-419	Sarcoma	Negative
Comp-420	Pancreas	CDKN2A:c.329G>A,p.(Trp110*)(30.7%); KRAS:c.34G>C,p.(Gly12Arg)(30.5%); TP53:c.524G>A,p.(Arg175His)(25.3%); SMAD4:c.1333C>T,p.(Arg445*)(5.4%)
Comp-421	Ovary	TP53:c.880G>T,p.(Glu294*)(93.5%)
Comp-422	Endometrial	TP53:c.743G>A,p.(Arg248Gln)(93.4%); PIK3CA:c.3140A>G,p.(His1047Arg)(67.8%); CDKN2A:c.238C>T,p.(Arg80*)(5.7%); PDGFRA:c.2522G>A,p.(Arg841Lys)(5.6%)
Comp-423	Appendix	TP53:c.586C>T,p.(Arg196*)(46.9%)
Comp-424	Gastric	Negative
Comp-425	NSCLC	TP53:c.836G>A,p.(Gly279Glu)(88.8%)
Comp-426	Breast	PIK3CA:c.1035T>A,p.(Asn345Lys)(60.3%)
Comp-427	Esophagus	TP53:c.452C>A,p.(Pro151His)(91.1%)
Comp-428	NSCLC	Negative
Comp-429	Pancreas	KRAS:c.35G>T,p.(Gly12Val)(78.2%); TP53:c.581T>C,p.(Leu194Pro)(62.8%)
Comp-430	Thyroid	BRAF:c.1799T>A,p.(Val600Glu)(38.9%)
Comp-431	Leiomyosarcoma	Negative
Comp-432	Breast	Negative
Comp-433	Pancreas	TP53:c.734G>A,p.(Gly245Asp)(56.7%); CTNNB1:c.134C>T,p.(Ser45Phe)(31.3%)
Comp-434	Cholangiocarcinoma	Negative
Comp-435	Cervix	Negative
Comp-436	Thyroid	BRAF:c.1799T>A,p.(Val600Glu)(46.3%)
Comp-437	Gastric	GNAS:c.2609A>T,p.(Gln870Leu)(29.6%); KRAS:c.35G>A,p.(Gly12Asp)(26.5%)
Comp-438	Endometrial	KRAS:c.35G>A,p.(Gly12Asp)(61.4%)
Comp-439	NSCLC	TP53:c.797G>A,p.(Gly266Glu)(80%)
Comp-440	Unknown primary	KRAS:c.35G>T,p.(Gly12Val)(42.2%)
Comp-441	Ovary	NRAS:c.182A>G,p.(Gln61Arg)(64.9%)
Comp-442	NSCLC	Negative
Comp-443	Ovary	EGFR:c.2162G>A,p.(Gly721Asp)(7.9%)
Comp-444	Pancreas	TP53:c.524G>A,p.(Arg175His)(29.7%); CDKN2A:c.172C>T,p.(Arg58*)(29.2%); KRAS:c.34G>C,p.(Gly12Arg)(21.3%)
Comp-445	Pancreas	SMAD4:c.363_373del,p.(Lys122Cysfs*17)(25.1%); KRAS:c.35G>A,p.(Gly12Asp)(22.8%)
Comp-446	Colon/Rectum	APC:c.4099C>T,p.(Gln1367*)(45.4%); KRAS:c.35G>T,p.(Gly12Val)(22.9%)
Comp-447	Colon/Rectum	KRAS:c.35G>A,p.(Gly12Asp)(56%); ATM:c.2554C>T,p.(Gln852*)(5%)
Comp-448	Ovary	PIK3CA:c.1624G>A,p.(Glu542Lys)(34.5%)
Comp-449	NSCLC	RB1:c.1072C>T,p.(Arg358*)(5.8%)
Comp-450	Colon/Rectum	NRAS:c.181C>A,p.(Gln61Lys)(86.9%); APC:c.4660G>T,p.(Glu1554*)(40.1%)
Comp-451	Renal	Negative
Comp-452	Prostate	PTEN:c.765dupA,p.(Glu256Argfs*42)(23.5%)
Comp-453	Ovary	TP53:c.584T>C,p.(Ile195Thr)(88.1%); SMARCB1:c.592C>T,p.(Gln198*)(8.8%); KIT:c.1900C>T,p.(Arg634Trp)(6.4%)
Comp-454	Endometrial	TP53:c.743G>A,p.(Arg248Gln)(87.8%)
Comp-455	Pancreas	KRAS:c.35G>A,p.(Gly12Asp)(24.1%); CDKN2A:c.260G>A,p.(Arg87Gln)(5.5%); RET:c.1853G>A,p.(Cys618Tyr)(5.1%)
Comp-456	Oral	TP53:c.659A>G,p.(Tyr220Cys)(72.4%)
Comp-457	GE junction	TP53:c.524G>A,p.(Arg175His)(60.5%)
Comp-458	Colon/Rectum	TP53:c.1024C>T,p.(Arg342*)(77.4%); APC:c.4285C>T,p.(Gln1429*)(47.8%)
Comp-459	Pancreas	TP53:c.844C>T,p.(Arg282Trp)(38.5%); APC:c.3925G>T,p.(Glu1309*)(28.3%); KRAS:c.35G>A,p.(Gly12Asp)(18%); GNAS:c.2530C>T,p.(Arg844Cys)(15.6%)
Comp-460	Gallbladder	TP53:c.742C>T,p.(Arg248Trp)(22.6%)
Comp-461	Breast	PIK3CA:c.3140A>G,p.(His1047Arg)(87%); TP53:c.524G>A,p.(Arg175His)(44.6%)
Comp-462	NSCLC	STK11:c.536C>G,p.(Pro179Arg)(87.9%); KRAS:c.64C>A,p.(Gln22Lys)(87.7%)
Comp-463	Thyroid	BRAF:c.1799T>A,p.(Val600Glu)(47.7%)
Comp-464	Other - specify	Negative
Comp-465	GE junction	Negative
Comp-466	Cholangiocarcinoma	TP53:c.817C>T,p.(Arg273Cys)(37.2%); KRAS:c.35G>T,p.(Gly12Val)(16.8%); SMAD4:c.1000delC,p.(Gln334Argfs*2)(14.4%); EGFR:c.2317C>T,p.(His773Tyr)(5.9%)
Comp-467	Unknown primary	Negative
Comp-468	NSCLC	Negative
Comp-469	Ovary	Negative
Comp-470	Oral	Negative
Comp-471	Mesothelioma	Negative
Comp-472	Thyroid	Negative
Comp-473	Colon/Rectum	TP53:c.586C>T,p.(Arg196*)(49.1%)
Comp-474	Renal	TP53:c.830G>T,p.(Cys277Phe)(56.3%)
Comp-475	Endometrial	TP53:c.406C>T,p.(Gln136*)(67%)
Comp-476	Colon/Rectum	TP53:c.818G>A,p.(Arg273His)(70.5%)
Comp-477	NSCLC	TP53:c.469G>T,p.(Val157Phe)(53.2%); BRAF:c.1799T>A,p.(Val600Glu)(36.7%)
Comp-478	Esophagus	TP53:c.839G>C,p.(Arg280Thr)(16.5%); TP53:c.711G>T,p.(Met237Ile)(14.6%)
Comp-479	Breast	Negative
Comp-480	Endometrial	PIK3CA:c.1633G>A,p.(Glu545Lys)(51.5%)
Comp-481	Cervix	PIK3CA:c.1624G>A,p.(Glu542Lys)(31.7%); PIK3CA:c.1357G>C,p.(Glu453Gln)(27.8%)
Comp-482	Cholangiocarcinoma	PIK3CA:c.1633G>A,p.(Glu545Lys)(38.2%)
Comp-483	Bladder	TP53:c.524G>A,p.(Arg175His)(30.4%); KRAS:c.436G>A,p.(Ala146Thr)(29.7%)
Comp-484	Breast	TP53:c.844C>T,p.(Arg282Trp)(60.5%); RB1:c.983dupA,p.(Asn328Lysfs*2)(7.3%)
Comp-485	Breast	Negative
Comp-486	GE junction	TP53:c.524G>A,p.(Arg175His)(44.1%)
Comp-487	Small Bowel	PTEN:c.968delA,p.(Asn323Metfs*21)(14.6%)
Comp-488	NSCLC	KRAS:c.35G>C,p.(Gly12Ala)(51.6%)
Comp-489	Pancreas	CDKN2A:c.250G>A,p.(Asp84Asn)(24.3%); TP53:c.535C>T,p.(His179Tyr)(16%); KRAS:c.35G>A,p.(Gly12Asp)(13.9%)
Comp-490	Pancreas	TP53:c.733G>A,p.(Gly245Ser)(36.1%); KRAS:c.35G>A,p.(Gly12Asp)(24.9%)
Comp-491	Oral	Negative
Comp-492	Renal	Negative
Comp-493	Bladder	PIK3CA:c.1633G>A,p.(Glu545Lys)(61.2%); CTNNB1:c.109T>C,p.(Ser37Pro)(38.1%); GNAS:c.2531G>A,p.(Arg844His)(33.7%)
Comp-494	Colon/Rectum	TP53:c.526delT,p.(Cys176Alafs*71)(53.3%)
Comp-495	Ovary	Negative
Comp-496	Breast	TP53:c.725G>T,p.(Cys242Phe)(75.2%)
Comp-497	Colon/Rectum	Negative
Comp-498	Cervix	KRAS:c.35G>C,p.(Gly12Ala)(21.1%); KRAS:c.34G>A,p.(Gly12Ser)(19.3%)
Comp-499	Oral	Negative
Comp-500	NSCLC	TP53:c.461G>T,p.(Gly154Val)(22.8%)
